# Supplementary material for: Clinical Profile of Tuberculum Sellae Meningiomas Based on Scoring System: An Institutional Experience in Indonesia
Source: MDPI journal article supplement (doi:10.3390/cancers15235700), 2023-12-03
Supplement: s1 [file s1]

Table S1: Data of Patient

| Nama       | Gender | Age   | Hemianopsia | Visual Accu | TumorDiameter | OpticCanal | VascularInv | Edema | Approach  | Clinical improvement | Histopathology                          | Complication |
|------------|--------|-------|-------------|-------------|---------------|------------|-------------|-------|-----------|----------------------|-----------------------------------------|--------------|
| Patient 1  | 2      | 31.00 | 0           | 1           | 2             | 2          | 2           | 0     | Pterional | Stable               | Meningothelial + Transitional           | No           |
| Patient 2  | 2      | 41.00 | 2           | 1           | 2             | 2          | 1           | 0     | COZ       | Improvement          | Meningothelial                          | No           |
| Patient 3  | 2      | 44.00 | 2           | 0           | 2             | 1          | 0           | 0     | Pterional | Stable               | Meningothelial + Microcystic            | No           |
| Patient 4  | 2      | 41.00 | 0           | 1           | 2             | 2          | 2           | 0     | Pterional | Stable               | Meningothelial + Microcystic            | No           |
| Patient 5  | 2      | 51.00 | 2           | 1           | 2             | 2          | 2           | 0     | Bifrontal | Stable               | Meningothelial + Transitional           | No           |
| Patient 6  | 2      | 58.00 | 1           | 1           | 1             | 1          | 1           | 0     | Pterional | Improvement          | Meningothelial                          | No           |
| Patient 7  | 2      | 47.00 | 2           | 1           | 2             | 2          | 2           | 0     | Pterional | Stable               | Meningothelial                          | No           |
| Patient 8  | 2      | 43.00 | 2           | 0           | 2             | 1          | 2           | 0     | Pterional | Improvement          | Meningothelial                          | No           |
| Patient 9  | 2      | 41.00 | 2           | 1           | 2             | 2          | 2           | 0     | Pterional | Stable               | Meningothelial + Fibrous                | No           |
| Patient 10 | 2      | 46.00 | 1           | 1           | 2             | 1          | 1           | 0     | Pterional | Stable               | Meningothelial + Fibrous + Transitional | No           |
| Patient 11 | 2      | 52.00 | 2           | 0           | 2             | 0          | 0           | 0     | Pterional | Worsen               | Meningothelial + Microcystic            | No           |
| Patient 12 | 2      | 42.00 | 0           | 1           | 2             | 2          | 2           | 0     | Pterional | Stable               | Meningothelial + Microcystic            | No           |
| Patient 13 | 2      | 50.00 | 2           | 1           | 2             | 2          | 2           | 0     | Pterional | Stable               | Meningothelial + Microcystic            | No           |
| Patient 14 | 2      | 54.00 | 2           | 1           | 2             | 2          | 2           | 0     | Bifrontal | Stable               | Meningothelial                          | No           |
| Patient 15 | 2      | 40.00 | 1           | 1           | 2             | 1          | 1           | 0     | Pterional | Improvement          | Meningothelial                          | No           |
| Patient 16 | 2      | 38.00 | 1           | 1           | 2             | 2          | 2           | 0     | Pterional | Stable               | Meningothelial                          | No           |
| Patient 17 | 2      | 50.00 | 2           | 1           | 2             | 2          | 2           | 0     | Pterional | Improvement          | Meningothelial                          | No           |
| Patient 18 | 2      | 45.00 | 0           | 1           | 2             | 1          | 1           | 0     | COZ       | Stable               | Meningothelial + Fibrous                | No           |
| Patient 19 | 2      | 58.00 | 1           | 1           | 2             | 2          | 2           | 1     | Bifrontal | Stable               | Meningothelial + Transitional           | No           |
| Patient 20 | 2      | 34.00 | 2           | 1           | 2             | 2          | 2           | 0     | Pterional | Improvement          | Meningothelial                          | No           |
| Patient 21 | 2      | 52.00 | 2           | 0           | 2             | 2          | 2           | 0     | Pterional | Improvement          | Meningothelial                          | No           |
| Patient 22 | 2      | 48.00 | 0           | 1           | 2             | 1          | 1           | 1     | Pterional | Stable               | Meningothelial                          | No           |
| Patient 23 | 2      | 37.00 | 1           | 1           | 2             | 2          | 1           | 0     | Pterional | Stable               | Meningothelial                          | No           |
| Patient 24 | 2      | 37.00 | 0           | 1           | 2             | 2          | 1           | 0     | COZ       | Stable               | Micocystic                              | No           |
| Patient 25 | 2      | 47.00 | 1           | 1           | 2             | 2          | 2           | 0     | Pterional | Stable               | Meningothelial                          | No           |
| Patient 26 | 2      | 43.00 | 2           | 1           | 1             | 1          | 1           | 0     | Pterional | Stable               | Meningothelial + Microcystic            | No           |
| Patient 27 | 2      | 57.00 | 2           | 1           | 1             | 2          | 2           | 0     | Pterional | Improvement          | Meningothelial + Transitional           | No           |
| Patient 28 | 2      | 45.00 | 2           | 1           | 2             | 2          | 2           | 0     | Pterional | Improvement          | Meningothelial                          | No           |
| Patient 29 | 2      | 40.00 | 1           | 1           | 2             | 2          | 2           | 0     | Pterional | Improvement          | Meningothelial                          | No           |

2 Female

0 N/A

0 &gt;=3/60 1 &lt;17

0 No

0 No

0 No

1 No

1 &lt;3/60 2 &gt;17

1 Unilateral 1 Yes

1 Yes

2 Yes

2 Bilateral
